# Supplementary material for: Atomically dispersed metal sites stabilized on a nitrogen doped carbon carrier via N2 glow-discharge plasma
Source: Royal Society of Chemistry journal article supplement (doi:10.1039/d0cc02949a), 2020-01-01
Supplement: d0cc02949a1.pdf [file d0cc02949a1.pdf]

## Supporting Information

### **Atomically dispersed metal sites stabilized on nitrogen doped carbon carrier via N<sub>2</sub> glow-discharge plasma**

Weijing Tang,<sup>‡a</sup> Jing Li,<sup>‡a</sup> Jian Zheng,<sup>a</sup> Wei Chu,<sup>\*a</sup> Ning Wang<sup>\*b,c</sup>

<sup>a</sup> Department of Chemical Engineering, Sichuan University, Chengdu 610065, China

<sup>b</sup> Advanced Membranes and Porous Materials Center, Physical Sciences and Engineering Division, King Abdullah University of Science and Technology, Thuwal 23955, Saudi Arabia

<sup>c</sup> College of Environmental and Energy Engineering, Beijing University of Technology, Beijing 100124, China

\*Corresponding author: [chuwei1965@scu.edu.cn](mailto:chuwei1965@scu.edu.cn) (Chu W),

[ning.wang.1@kaust.edu.sa](mailto:ning.wang.1@kaust.edu.sa) (Wang N)

<sup>‡</sup> These authors contributed equally to this work.

## 1. Experimental section

**Chemicals.** Chloroplatinic acid ( $\text{H}_2\text{PtCl}_6 \cdot x\text{H}_2\text{O}$ , 98%, Adamas), palladium nitrate ( $\text{Pd}(\text{NO}_3)_2$ , 98%, Adamas), cobalt nitrate hexahydrate ( $\text{Co}(\text{NO}_3)_2 \cdot 6\text{H}_2\text{O}$ , 98%, Mclean), copper nitrate nonahydrate ( $\text{Cu}(\text{NO}_3)_2 \cdot 9\text{H}_2\text{O}$ , 98%, Mclean), silver nitrate ( $\text{AgNO}_3$ , 98%, Mclean), ethanol (EtOH, Mclean), Nafion (Dupont, 5 wt%, Mclean), acetylene black (Mclean), commercial 20 wt% Pt/C (20 wt% metal, Mclean), sulphuric acid ( $\text{H}_2\text{SO}_4$ , 98%, Beijing Chemical Reagents). The distilled water used in all experiments was obtained through filtration.

**The adjustable synthesis of Pt/C-N.** The Pt/C-N samples were prepared by a simple impregnated-plasma method. Briefly, 100 mg acetylene black was dispersed in 5 ml ethanol. Then 0.05 ml, 0.25 ml, 0.5 ml, 1 ml  $\text{H}_2\text{PtCl}_6 \cdot x\text{H}_2\text{O}$  solution (0.01 M) were added into above solution, respectively, followed by ultrasound for 2 h. Subsequently, the impregnated suspension dried in an oven at 60 °C for 12 h. After that, the sample placed in a porcelain boat was treated by  $\text{N}_2$  glow discharge plasma for 2 h. The power of nitrogen plasma and the flow rate of nitrogen gas were fixed at 80 W and 20 ml/min. And the vacuum for nitrogen plasma was 10 Pa. At last, Pt/C-N with different theoretical loading of about 0.1, 0.5, 1, 2 wt% were obtained (marked as 0.1Pt/C-N, 0.5Pt/C-N, 1Pt/C-N, 2Pt/C-N).

**The preparation of M/C-N.** The synthesis of Pd/C-N, Ag/C-N, Co/C-N and Cu/C-N followed the preparation of Pt/C-N, replacing the precursor with 0.1 ml  $\text{Pd}(\text{NO}_3)_2$  (0.01 M), 0.5 ml  $\text{AgNO}_3$  (0.01 M), 0.8 ml  $\text{Co}(\text{NO}_3)_2 \cdot 6\text{H}_2\text{O}$  (0.01 M), 0.8 ml  $\text{Cu}(\text{NO}_3)_2 \cdot 6\text{H}_2\text{O}$ , respectively.

**The synthesis of 2Pt/C-800.** 100 mg acetylene black placed in a porcelain boat was treated by  $\text{N}_2$  glow discharge plasma for 2 h with power of 80 W and pressure of 10 Pa. And the flow rate of  $\text{N}_2$  was fixed at 20 ml/min. Then acetylene black was dispersed in 5 ml ethanol. 1 ml  $\text{H}_2\text{PtCl}_6 \cdot x\text{H}_2\text{O}$  solution (0.01 M) was added into the above solution under ultrasound for 2 h. Subsequently, the impregnated suspension

dried in an oven at 60 °C for 12 h. After that, the sample was placed in a porcelain boat and heated to 800 °C for 1 h at heating rate 5 °C/min under flowing N<sub>2</sub>. The black powder was obtained when the temperature was cooled to room temperature.

**The synthesis of 2Pt/C-Ar.** The preparation of 2Pt/C-Ar was similar to that of 2Pt/C-N except using Ar plasma for the treatment of drying samples.

**Physicochemical characterization.** The high-angle annular dark-field scanning transmission electron microscope (HAADF-STEM) and energy dispersive X-ray spectroscopy (EDS) elemental mapping were recorded on an FEI Titan 80-300 microscope equipped with a monochromator and a probe Cs corrector operated at 300 kV. XPS measurement was carried out on an Escalab 250Xi (XPS). All the elemental spectra were corrected with respect to C1s peaks at 284.8 eV and analyzed by the XPSPEAK 4.1 software. Powder X-ray diffraction pattern (XRD) was obtained using a Bruker D8. Advance instrument with Cu K $\alpha$  radiation ( $\lambda = 0.1542$  nm) operated at 40 kV and 40 mA. The inductively coupled plasma optical emission spectrometer (ICP-OES) was conducted to determine the Pt content of catalysts, such as 1Pt/C-N, 2Pt/C-Ar.

**XAFS measurement and analysis.** The X-ray absorption spectra were collected at the beamline BL01C1 in NSRRC provided technical support by Ceshigo Research Service “[www.ceshigo.com](http://www.ceshigo.com)“. The radiation was monochromatized by a Si (111) double-crystal monochromator. The samples were pressed into pellets that with certain thickness for optimum signal-noise-ratio based on the adsorption length calculation. A Pt foil was placed downstream of the sample cell, as a reference to calibrate the photon energy of each spectrum. The obtained XAFS data was processed in Athena (version 0.9.25) for background removal, pre-edge line and post-edge line calibrations. Then Fourier transformed fitting was carried out in Artemis (version 0.9.25). As Pt is a high Z metal, in order to highlight the possible existence of Pt-Pt scattering, the  $k^3$  weighting,  $k$ -range of 3 - 13 Å<sup>-1</sup> and R range of 1 - 5 Å were used for the fitting. The computed coordinates were used to generate the primary input for the

ab initio EXAFS scattering code (FEFF9). The model of bulk Pt, PtO and PtO<sub>2</sub> were used to calculate the simulated scattering paths and to calibrate the multielectron effects ( $S_0^2$ ) and reference energy value ( $E_0$ ). We also modified the crystalline structure of PtO by replacing O with N and C atoms to provide the optimized coordinates with the ab initio EXAFS scattering code (FEFF9) for the sample fitting. For Wavelet Transform analysis, the  $\chi(k)$  exported from Athena was imported into the Hama Fortran code. The parameters were listed as follow: R range, 1 - 4 Å, k range, 0 - 13 Å<sup>-1</sup>; k weight, 2; and Morlet function with  $\kappa=10$ ,  $\sigma=1$  was used as the mother wavelet to provide the overall distribution.

**Electrochemical measurements.** All the electrochemical experiments were conducted on electrochemical workstation (CHI 660E) in a three-electrode system in 0.5 M H<sub>2</sub>SO<sub>4</sub> solution (degassed with N<sub>2</sub>) at room temperature. A graphite rod and an Ag/AgCl (3 M KCl) electrode were used as the counter and reference electrode, respectively. The working electrode was fabricated as follows: 5 mg of catalyst was dispersed ultrasonically in a mixed solution of 950  $\mu$ l of ethanol and 50  $\mu$ l of nafion (Dupont, 5 wt%). Then 10  $\mu$ l of fresh catalyst ink was dropped onto a glassy-carbon electrode (GC; 5 mm in diameter.) and dried at room temperature. The HER was conducted in N<sub>2</sub>-saturated 0.5 M H<sub>2</sub>SO<sub>4</sub> solution with a scan rate of 5 mV s<sup>-1</sup>. The potential vs. Ag/AgCl was converted to the reversible hydrogen electrode (RHE) by the equation ( $E_{\text{RHE}}=E_{\text{Ag/AgCl}} + 0.197 + 0.059 \times \text{PH}$ ). The durability of catalysts was evaluated by 1000 cyclic voltammetry sweeps between 0.2 and -0.1 V in 0.5 M H<sub>2</sub>SO<sub>4</sub>.

## 2. Supplementary Figures

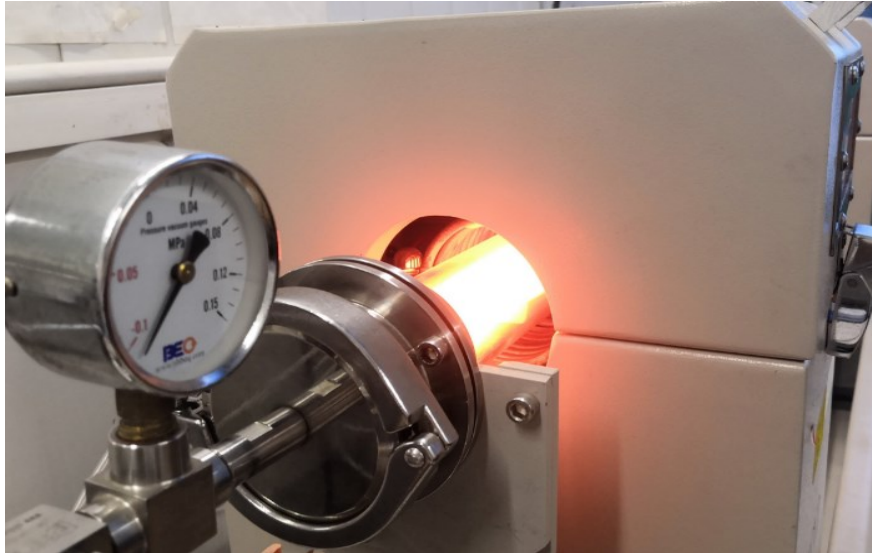

**Fig. S1.** The photograph of the low-temperature plasma appliance emitting N<sub>2</sub> plasma in orange glow.

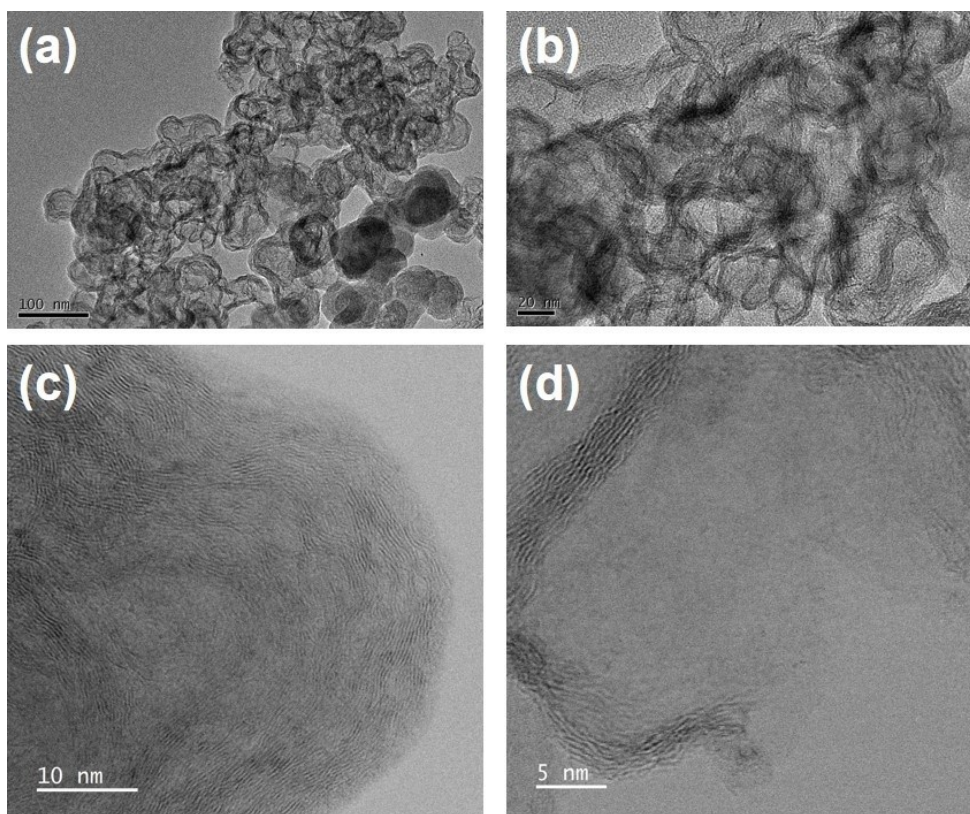

**Fig. S2.** (a) TEM of 2Pt/C-N. (b) HRTEM of 2Pt/C-N. (c)-(d) STEM of 2Pt/C-N.

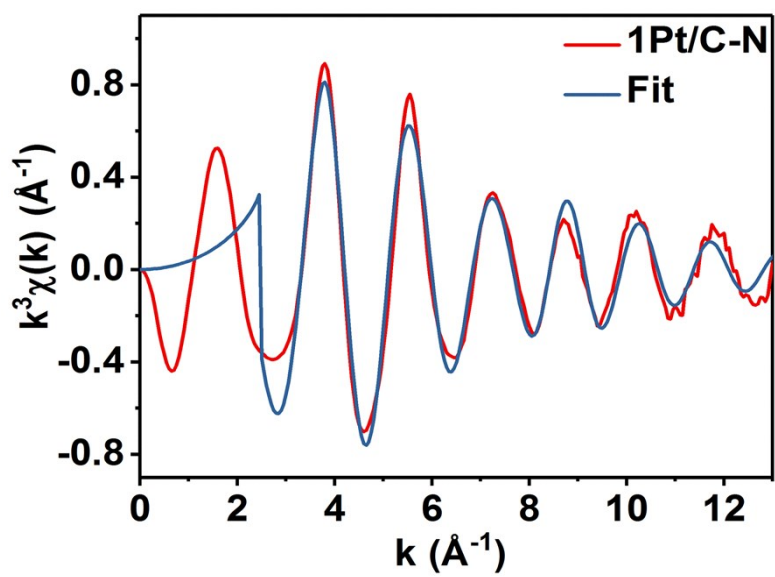

**Fig. S3.** Fourier-transformed magnitude of 1Pt/C-N K-edge EXAFS spectra in K space.

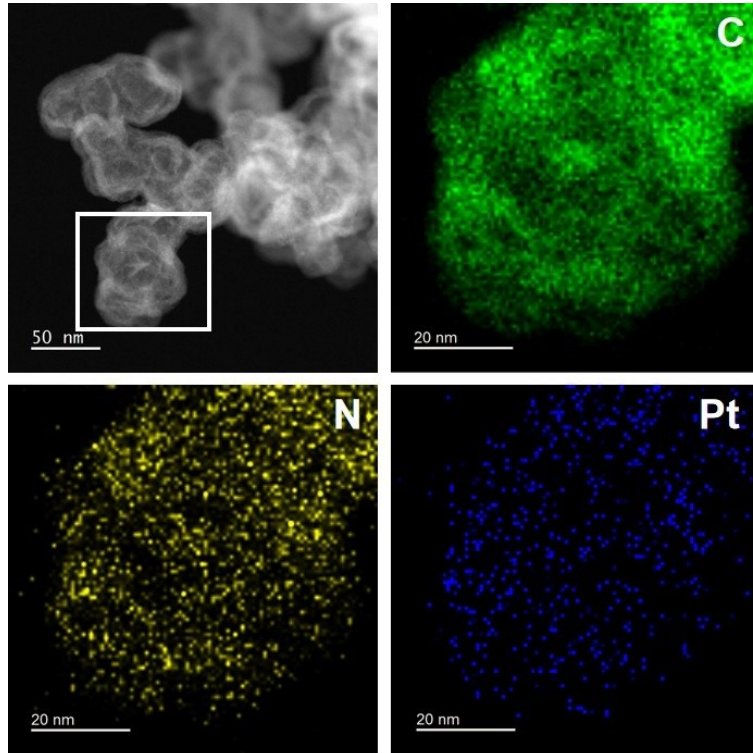

**Fig. S4.** EDS mapping of 2Pt/C-N.



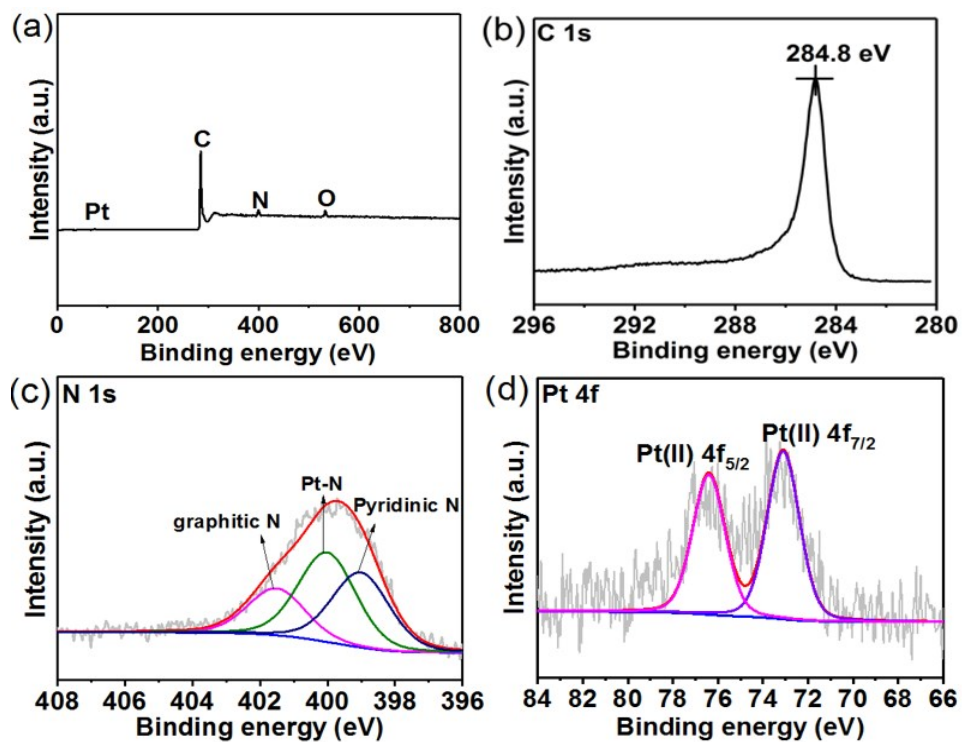

**Fig. S5.** Compositional characterizations on the 1Pt/C-N. (a) XPS survey spectrum. (b) C 1s XPS spectrum of 1Pt/C-N. (c) N 1s XPS spectrum of 1Pt/C-N and (d) Pt 4f XPS spectra of 1Pt/C-N.

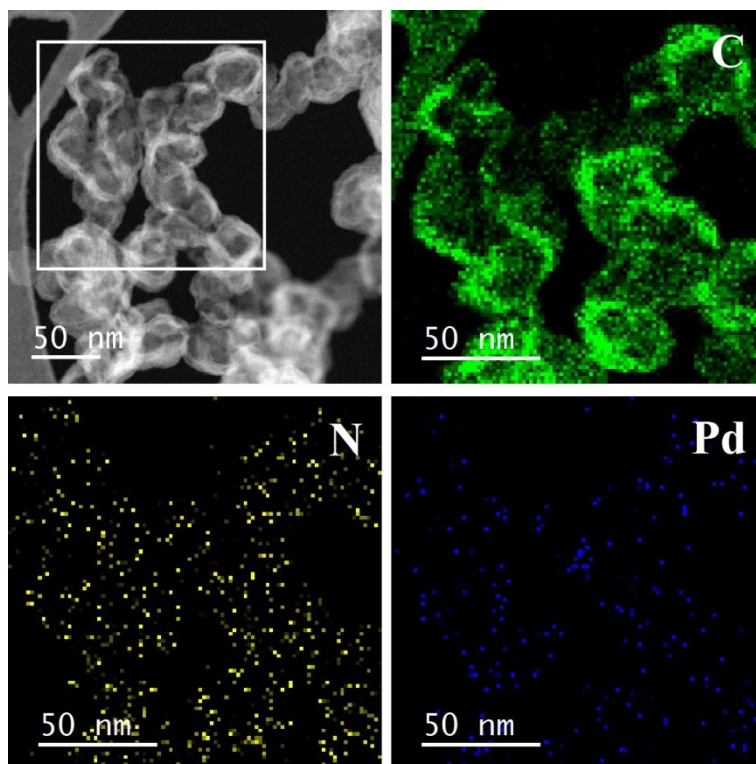

**Fig. S6.** HAADF-STEM image of Pd/C-N and corresponding element maps showing the distribution of C, N and Pd.

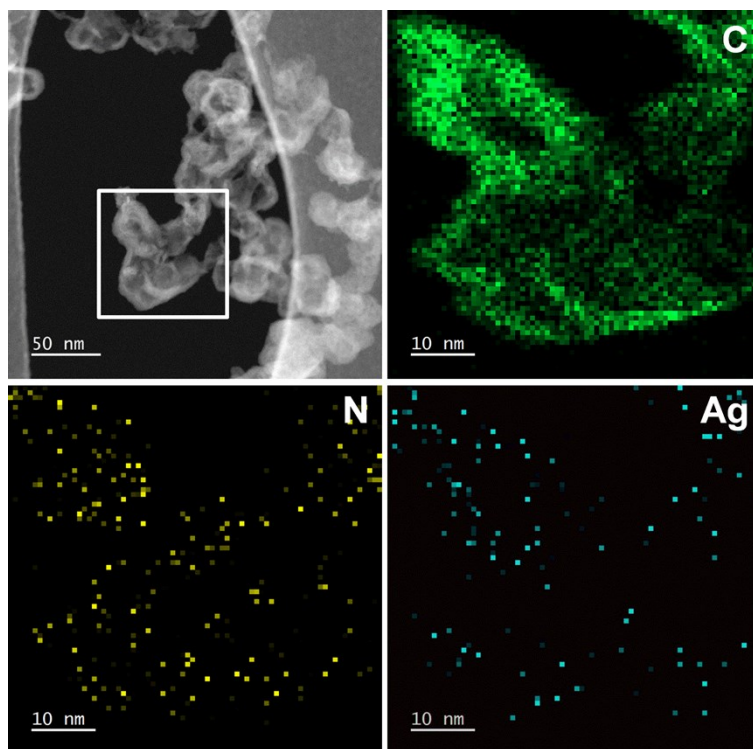

**Fig. S7.** HAADF-STEM image of Ag/C-N and corresponding element maps showing the distribution of C, N and Ag.

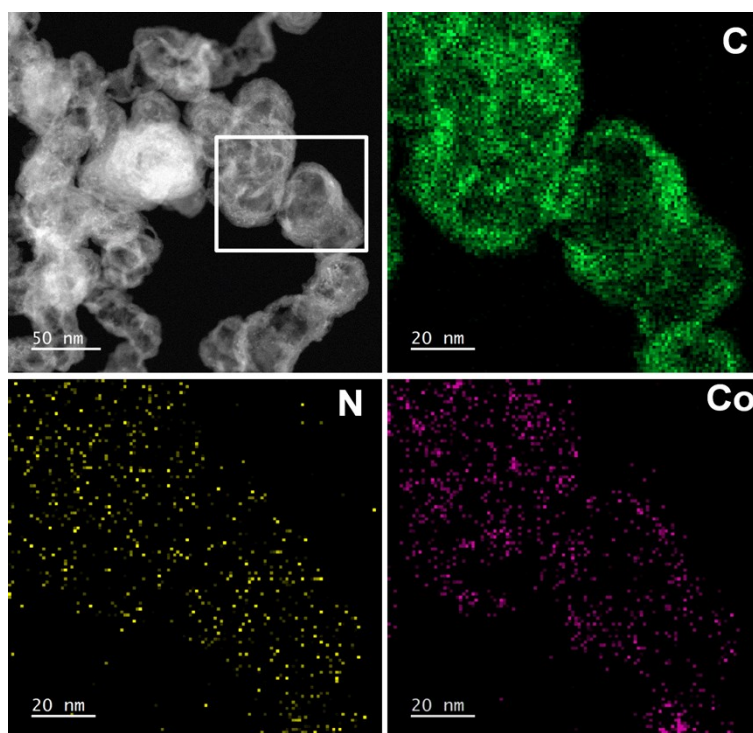

**Fig. S8.** HAADF-STEM image of Co/C-N and corresponding element maps showing the distribution of C, N and Co.

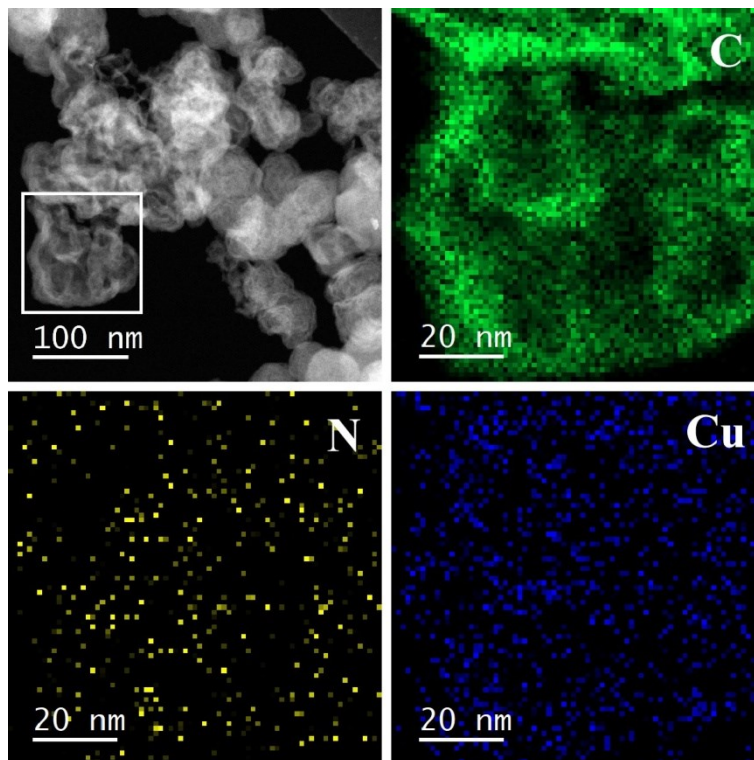

**Fig. S9.** HAADF-STEM image of Cu/C-N and corresponding element maps showing the distribution of C, N and Cu.

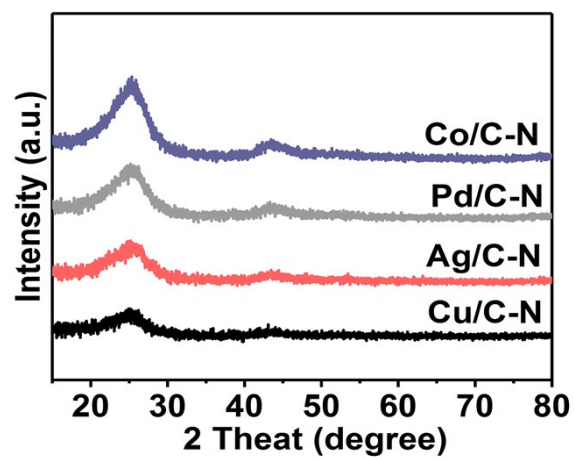

**Fig. S10.** XRD pattern of Pd/C-N, Ag/C-N, Co/C-N, Cu/C-N.

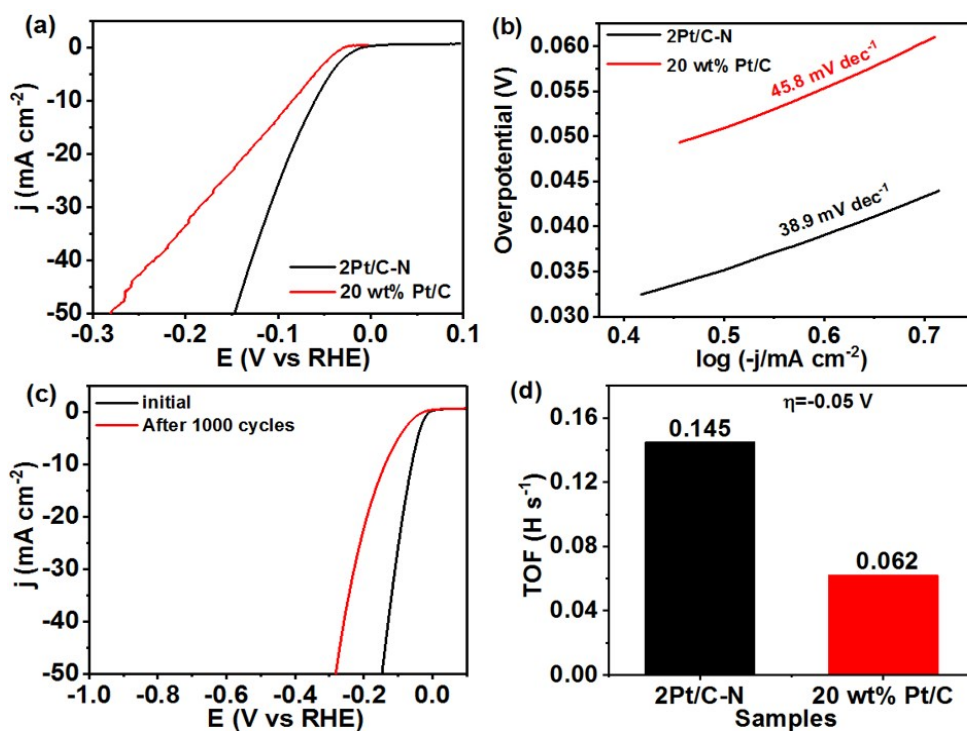

**Fig. S11.** HER performance of samples after IR-compensation. (a) Polarization curves. (b) Tafel plots. (c) LSV curves of 2Pt/C-N before and after 1000 CV cycles. (d) TOF values of 2Pt/C-N and 20 wt% Pt/C.

### 3. Supplementary Tables

**Table S1.** Structural parameters of 1Pt/C-N, the reference PtO<sub>2</sub> and Pt foil extracted from quantitative EXAFS fitting curves.

| Sample           | Path  | CN      | R (Å)       | DWF           | R factor |
|------------------|-------|---------|-------------|---------------|----------|
| Pt foil          | Pt-Pt | 12*     | 2.761±0.011 | 0.0044+0.0006 | 0.01     |
|                  | Pt-Pt | 6*      | 3.912±0.014 | 0.0060+0.0021 |          |
| PtO <sub>2</sub> | Pt-O  | 6*      | 1.998±0.030 | 0.0029+0.0008 | 0.01     |
|                  | Pt-Pt | 6*      | 3.103±0.021 | 0.0021+0.0012 |          |
| 1Pt/C-N          | Pt-N  | 1.9±0.8 | 1.821±0.031 | 0.0129+0.0038 | 0.02     |
|                  | Pt-C  | 3.8±1.4 | 2.515±0.043 | 0.0071+0.0029 |          |

\* Parameter set to the theoretical model; CN is the coordination number; R is interatomic distance (the bond length between central atoms and surrounding coordination atoms); DWF is a measure of thermal and static disorder in absorber-scatterer distances; R factor is goodness of fitting.

**Table S2.** Collected data of HER activity in electrolyte solution.

| Samples                              | Electrolyte                          | Overpotential (mV/mA cm <sup>-2</sup> ) | Loading (mg cm <sup>-2</sup> ) | TOF (H <sub>2</sub> s <sup>-1</sup> /mV) | References |
|--------------------------------------|--------------------------------------|-----------------------------------------|--------------------------------|------------------------------------------|------------|
| PtSAS/AG                             | 0.5 M H <sub>2</sub> SO <sub>4</sub> | 12/10                                   | 7.07                           | 0.325/12                                 | 1          |
| W-SAC                                | 0.1 M KOH                            | 85/10                                   | 0.204                          | 1.16/20                                  | 2          |
| Mo-Co <sub>9</sub> S <sub>8</sub> @C | 0.5 M H <sub>2</sub> SO <sub>4</sub> | 98/10                                   | 1.0                            | 0.5/98                                   | 3          |
| Pt <sub>1</sub> /OLC                 | 0.5 M H <sub>2</sub> SO <sub>4</sub> | 38/10                                   | 0.51                           | 40.78/100                                | 4          |



|                                             |                                      |        |        |          |           |
|---------------------------------------------|--------------------------------------|--------|--------|----------|-----------|
| Pt <sub>1</sub> /hNCN<br>C-2.92             | 0.5 M H <sub>2</sub> SO <sub>4</sub> | 15/10  | 0.09   | 7.67/20  | 5         |
| ALDPt/50<br>NGN                             | 0.5 M H <sub>2</sub> SO <sub>4</sub> | 24/10  | 0.0764 | 6.3/24   | 6         |
| RuSAs@P<br>N                                | 0.5 M H <sub>2</sub> SO <sub>4</sub> | 24/10  | 1      | 2.18/30  | 7         |
| Mo <sub>2</sub> TiC <sub>2x</sub> -<br>PtSA | 0.5 M H <sub>2</sub> SO <sub>4</sub> | 30/10  | 1      | 0.84/30  | 8         |
| Mo-SAC                                      | 0.1 M KOH                            | 132/10 | 0.408  | 0.148/50 | 9         |
| Co <sub>1</sub> /PCN                        | 1.0 M KOH                            | 89/10  | 0.5    | 0.22/50  | 10        |
| Ni/GD                                       | 0.5 M H <sub>2</sub> SO <sub>4</sub> | 88/10  | 0.896  | 1.59/100 | 11        |
| 2Pt/C-N                                     | 0.5 M H <sub>2</sub> SO <sub>4</sub> | 60/10  | 0.255  | 0.145/50 | This work |

## References

1. S. H. Ye, F. Y. Luo, Q. L. Zhang, P. Y. Zhang, T. T. Xu, D. S. He, L. C. Guo, Y. Zhang, C. X. He, X. P. Ouyang, Q. Wang, M. Gu, J. H. Liu and X. L. Sun, *Energy Environ. Sci.*, 2019, **12**, 1000.
2. W. X. Chen, J. J. Pei, C. T. He, J. W. Wan, H. L. Ren, Y. Wang, J. C. Dong, K. L. Wu, W. C. Cheong, J. J. Mao, X. S. Zheng, W. S. Yan, Z. B. Zhuang, C. Chen, Q. Peng, D. S. Wang and Y. D. Li, *Adv. Mater.*, 2018, **30**, 1800396.
3. L. G. Wang, X. X. Duan, X. J. Liu, J. Gu, R. Si, Y. Qiu, Y. M. Qiu, D. Shi, F. H. Chen, X. M. Sun, J. H. Lin and J. L. Sun, *Adv. Energy Mater.*, 2019, **10**, 1903137.
4. D. B. Lin, X. Y. Li, S. M. Chen, H. Yan, C. D. Wang, C. Q. Wu, Y. Haleen, S. Duan, J. L. Lu, B. H. Ge, P. Ajayan, Y. Luo, J. Jiang and L. Song, *Nat. Energy*, 2019, **4**, 512.

5. Z. Q. Zhang, Y. G. Chen, L. Q. Zhou, C. Chen, Z. Han, B. S. Zhang, Q. Wu, L. J. Yang, L. Y. Du, Y. F. Bu, P. Wang, X. Z. Wang, H. Yang and Z. Hu, *Nat. Commun.*, 2019, **10**, 1657.
6. N. C. Cheng, S. Stambula, D. Wang, M. N. Banis, J. Liu, A. Riese, B. W. Xiao, R. Y. Li, T. K. Sham, L. M. Liu, G. Botton and X. L. Sun, *Nat. Commun.*, 2016, **7**, 13638.
7. J. Yang, B. X. Chen, X. K. Liu, W. Liu, Z. J. Li, J. C. Dong, W. X. Chen, W. S. Yan, T. Yao, X. Z. Duan, Y. E. Wu and Y. D. Li, *Angew. Chem., Int. Ed.*, 2018, **57**, 9495.
8. J. Q. Zhang, Y. F. Zhao, X. Guo, C. Chen, C. L. Dong, R. S. Liu, C. Han, Y. D. Li, Y. Gogotsi and G. X. Wang, *Nat. Catal.*, 2018, **1**, 985.
9. W. X. Chen, J. J. Pei, C. T. He, J. W. Wan, H. L. Ren, Y. Q. Zhu, Y. Wang, J. C. Dong, S. B. Tian, W. C. Cheong, S. Q. Lu, L. R. Zheng, X. S. Zheng, W. S. Yan, Z. B. Zhuang, C. Chen, Q. Peng, D. S. Wang and Y. D. Li, *Angew. Chem., Int. Ed.*, 2017, **56**, 16086.
10. L. L. Cao, Q. Q. Luo, W. Liu, Y. Lin, X. K. Liu, Y. J. Cao, W. Zhang, Y. E. Wu, J. L. Yang, T. Yao and S. Q. Wei, *Nat. Catal.*, 2019, **2**, 134.
11. Y. R. Xue, B. L. Huang, Y. P. Yi, Y. Guo, Z. C. Zuo, Y. J. Li, Z. Y. Jia, H. B. Liu and Y. L. Li, *Nat. Commun.*, 2018, **9**, 1460.
